# Supplementary material for: Super-resolution Reconstruction MRI Application in Fetal Neck Masses and Congenital High Airway Obstruction Syndrome
Source: PubMed Central journal article supplement — OTO Open. 2021 Oct 25;5(4):2473974X211055372. doi: 10.1177/2473974X211055372 (PMC8549475; doi:10.1177/2473974x211055372), 2021-10-25
Supplement: sj-pdf-1-opn-10.1177_2473974X211055372.pdf [file sj-pdf-1-opn-10.1177_2473974X211055372.pdf]

Online Supplement:

- eTable 1: Clinical Questions
- eTable 2: Hart and Staveland's NASA Task Load Index (TLX) assesses workload on five 7-point scales (total of 21 gradations per each subjective subscale). Increments of high, medium, and low estimates for each point result in 21 gradations on the scale.
- eFigure 1: Airway Patency Confidence Average.
- eFigure 2: Airway Patency Confidence Average – Based on SRR Quality.
- eFigure 3: Anatomical Clarity Average – Based on SRR Quality.

| <b>Theme 1: Diagnosis and Confidence of Airway Patency</b>                      |                                                                                                                                                                                                                                                         |
|---------------------------------------------------------------------------------|---------------------------------------------------------------------------------------------------------------------------------------------------------------------------------------------------------------------------------------------------------|
| Question                                                                        | Scoring System                                                                                                                                                                                                                                          |
| Airway Patency                                                                  | 1: Yes<br><br>0: No                                                                                                                                                                                                                                     |
| Confidence regarding airway patency                                             | 1: not confident at all<br><br>2: slightly confident<br><br>3: somewhat confident<br><br>4: fairly confident<br><br>5: completely confident                                                                                                             |
| <b>Theme 2: Anatomical Clarity (Subjective)</b>                                 |                                                                                                                                                                                                                                                         |
| Anatomical Clarity                                                              | 0: structure not seen<br><br>1: poor depiction<br><br>2: suboptimal visualisation<br><br>3: clear visualisation of structure but reduced tissue contrast; image-based diagnosis feasible<br><br>4: excellent depiction; optimal for diagnostic purposes |
| <b>Theme 3: Characteristics of mass and Extent of Head and Neck Involvement</b> |                                                                                                                                                                                                                                                         |
| Compression                                                                     | 1: Yes<br><br>0: No                                                                                                                                                                                                                                     |
| Encased                                                                         | 1: Yes<br><br>0: No                                                                                                                                                                                                                                     |
| Cystic?                                                                         | 1: Yes<br><br>0: No                                                                                                                                                                                                                                     |
| Septated?                                                                       | 1: Yes<br><br>0: No                                                                                                                                                                                                                                     |
| Solid?                                                                          | 1: Yes<br><br>0: No                                                                                                                                                                                                                                     |

|                          |                 |
|--------------------------|-----------------|
| Vascular?                | 1: Yes<br>0: No |
| Neck Involvement         | 1: Yes<br>0: No |
| Facial Involvement       | 1: Yes<br>0: No |
| Intra-thoracic extension | 1: Yes<br>0: No |

eTable 1: Clinical Questions

| <b>Subjective Subscale</b> | <b>Description</b>                                                     |
|----------------------------|------------------------------------------------------------------------|
| Mental Demand              | How mentally hurried was the task?                                     |
| Physical Demand            | How physically demanding was the task?                                 |
| Temporal Demand            | How hurried or rushed was the pace of the task?                        |
| Performance                | How successful were you in accomplishing what you were asked to do?    |
| Effort                     | How hard did you have to work to accomplish your level of performance? |
| Frustration                | How insecure, discouraged, irritated, stressed, and annoyed were you?  |

eTable 2: Hart and Staveland's NASA Task Load Index (TLX) assesses workload on five 7-point scales (total of 21 gradations per each subjective subscale). Increments of high, medium, and low estimates for each point result in 21 gradations on the scale.

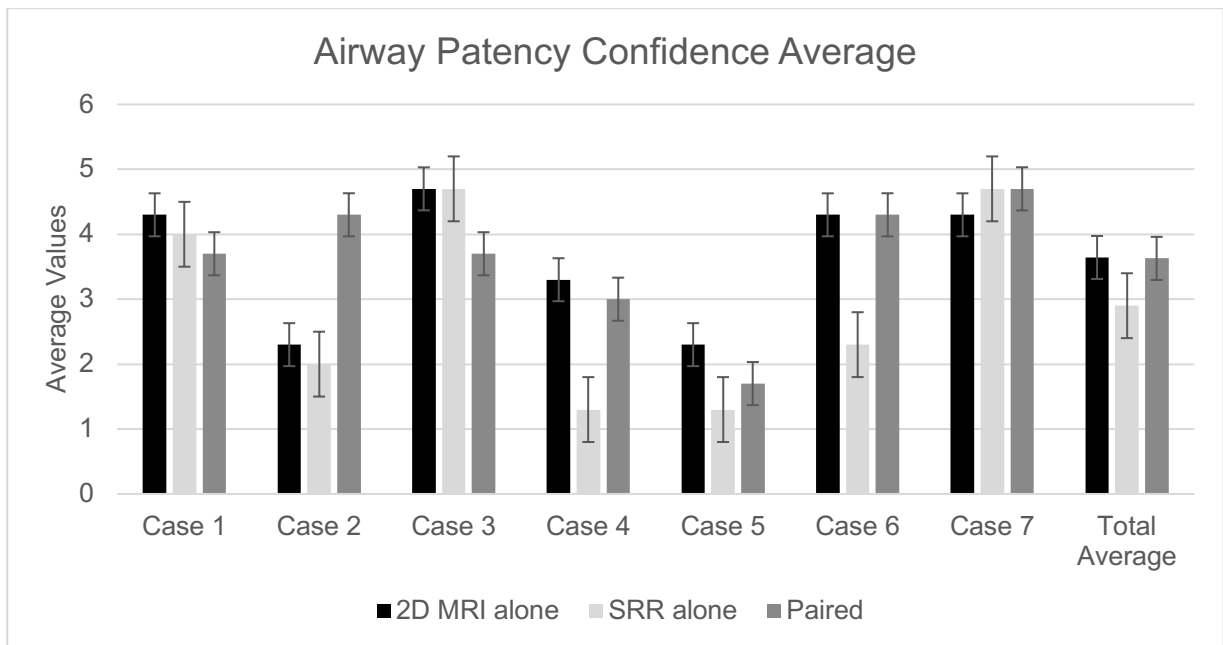

eFigure 1: Average of Airway Patency Confidence of the three radiologists. This is illustrated for each of the seven cases of airway obstruction and the total average.

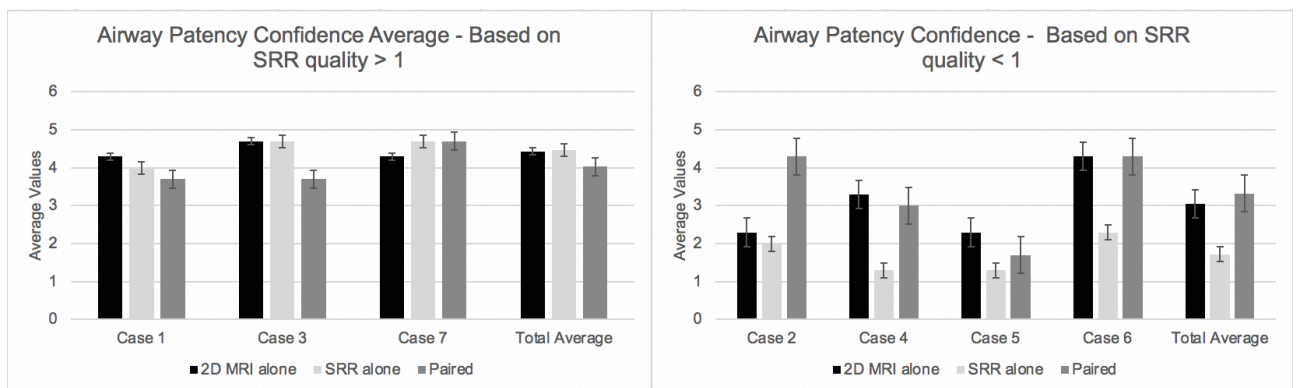

eFigure 2: Average of Airway Patency Confidence of three radiologists based on SRR quality >1 (left) and SRR quality < 1 (right) using 2D MRI alone, SRR alone, or Paired.

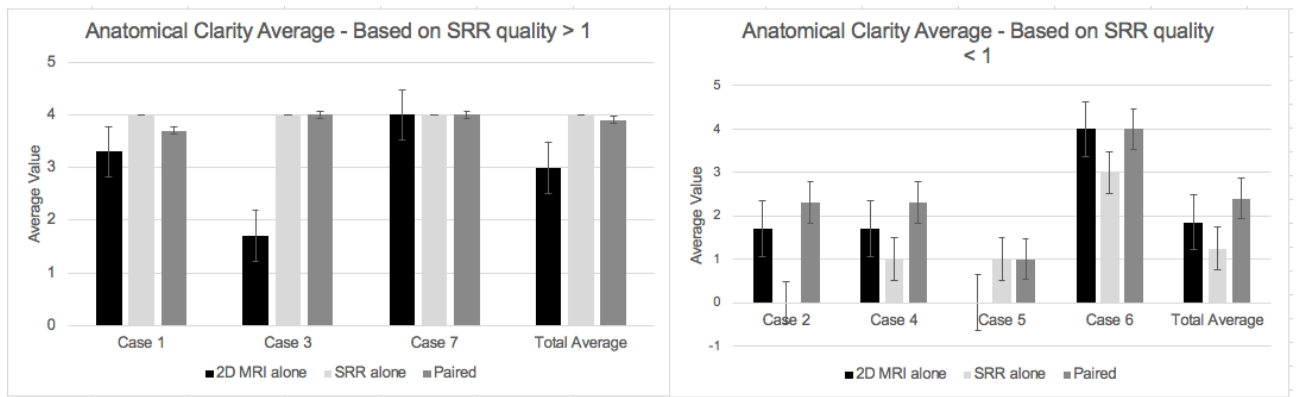

eFigure 3: Average of Anatomical Clarity Average of three radiologists based on SRR quality >1 (left) and SRR quality < 1 (right) using 2D MRI alone, SRR alone, and Paired Imaging.
